# Supplementary material for: Isolation of Mirificin and Other Bioactive Isoflavone Glycosides from the Kudzu Root Lyophilisate Using Centrifugal Partition and Flash Chromatographic Techniques
Source: MDPI journal article supplement (doi:10.3390/molecules27196227), 2022-09-22
Supplement: s1 [file s1]

## Article

# Isolation of Mirificin and Other Bioactive Isoflavone Glycosides from the Kudzu Root Lyophilisate Using Centrifugal Partition and Flash Chromatographic Techniques

Magdalena Maciejewska-Turska <sup>1\*</sup>, Łukasz Pecio <sup>1,2</sup> and Grażyna Zgórk <sup>1</sup><sup>1</sup> Department of Pharmacognosy with the Medicinal Plant Garden, Faculty of Pharmacy, Medical University of Lublin, 1 Chodzki Str., 20-093 Lublin, Poland<sup>2</sup> Department of Biochemistry and Crop Quality, Institute of Soil Science and Plant Cultivation, State Research Institute, 24-100 Pulawy, Poland

\* Correspondence: magdalena.maciejewska@umlub.pl

**Citation:** Lastname, F.; Lastname, F.;  
Lastname, F. Title. *Molecules* **2022**,  
27, 6227. [https://doi.org/10.3390/  
molecules27196227](https://doi.org/10.3390/molecules27196227)

Academic Editor: Chia Ming Chang

Received: 12 August 2022

Accepted: 20 September 2022

Published: 22 September 2022

**Publisher's Note:** MDPI stays neutral with regard to jurisdictional claims in published maps and institutional affiliations.

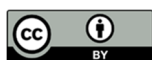

**Copyright:** © 2022 by the authors.  
Licensee MDPI, Basel, Switzerland.  
This article is an open access article distributed under the terms and conditions of the Creative Commons Attribution (CC BY) license (<https://creativecommons.org/licenses/by/4.0/>).

## Supplementary Materials

**Table S1.**  $^1\text{H}$ - and  $^{13}\text{C}$ -NMR spectral data obtained for puerarin, 3'-methoxypuerarin, mirificin and daidzin

| No                  | Puerarin *                                   |                     | 3'-Methoxypuerarin             |                                          | Mirificin                      |                       | Daidzin                               |                     |
|---------------------|----------------------------------------------|---------------------|--------------------------------|------------------------------------------|--------------------------------|-----------------------|---------------------------------------|---------------------|
|                     | $\delta_{\text{H}}$                          | $\delta_{\text{C}}$ | $\delta_{\text{H}}$            | $\delta_{\text{C}}$                      | $\delta_{\text{H}}$            | $\delta_{\text{C}}$   | $\delta_{\text{H}}$                   | $\delta_{\text{C}}$ |
| 2                   | 8.33, s                                      | 152.6               | 8.39, s                        | 152.8                                    | 8.32, s                        | 152.5                 | 8.38, s                               | 153.2               |
| 3                   |                                              | 122.5               |                                | 122.9                                    |                                | 122.5                 |                                       | 122.3               |
| 4                   |                                              | 174.8               |                                | 174.8                                    |                                | 174.8                 |                                       | 174.7               |
| 5                   | 7.94, d (8.8)                                | 126.2               | 7.94, d (8.8)                  | 126.2                                    | 7.94, d (8.9)                  | 126.2                 | 8.05, d (8.9)                         | 126.9               |
| 6                   | 6.99, d (8.8)                                | 114.9               | 6.99, d (8.8)                  | 114.9                                    | 6.99, d (8.9)                  | 115.2                 | 7.14, dd (8.9, 2.3)                   | 115.5               |
| 7                   |                                              | 161.0               |                                | 161.0                                    |                                | 160.9                 |                                       | 161.4               |
| 8                   |                                              | 112.6               |                                | 112.5                                    |                                | 112.5                 | 7.23, d (2.3)                         | 103.4               |
| 9                   |                                              | 155.9               |                                | 156.0                                    |                                | 156.0                 |                                       | 157.0               |
| 10                  |                                              | 116.9               |                                | 117.0                                    |                                | 116.9                 |                                       | 118.4               |
| 1'                  |                                              | 123.0               |                                | 123.0                                    |                                | 123.1                 |                                       | 123.7               |
| 2'                  | 7.40, d (8.6)                                | 129.9               | 7.17, d (2.0)                  | 113.1                                    | 7.40, d (8.6)                  | 130.0                 | 7.41, d (8.6)                         | 130.0               |
| 3'                  | 6.80, d (8.6)                                | 114.9               |                                | 147.1                                    | 6.80, d (8.6)                  | 114.9                 | 6.82, d (8.6)                         | 114.9               |
| 4'                  |                                              | 157.1               |                                | 146.4                                    |                                | 157.1                 |                                       | 157.2               |
| 5'                  | 6.80, d (8.6)                                | 114.9               | 6.81, d (8.2)                  | 115.1                                    | 6.80, d (8.6)                  | 114.9                 | 6.82, d (8.6)                         | 114.9               |
| 6'                  | 7.40, d (8.6)                                | 129.9               | 7.04, dd (8.2, 2.0)            | 121.5                                    | 7.40, d (8.6)                  | 130.0                 | 7.41, d (8.6)                         | 130.0               |
| 3'-OCH <sub>3</sub> |                                              |                     | 3.80, s                        | 55.6                                     |                                |                       |                                       |                     |
|                     | 8-C- $\beta$ -Glc <sub>p</sub>               |                     | 8-C- $\beta$ -Glc <sub>p</sub> |                                          | 8-C- $\beta$ -Glc <sub>p</sub> |                       | 7-O- $\beta$ -Glc <sub>p</sub>        |                     |
| 1''                 | 4.82, d (9.8)                                |                     | 73.4                           | 4.82, d (9.9)                            | 73.4                           | 4.81, d (9.7)         | 5.10, d (7.4)                         | 100.0               |
| 2''                 | 4.02, t (9.2)                                |                     | 70.8                           | 4.03, t (9.9)                            | 70.8                           | 4.00, t (9.2)         | 3.30, dd (8.9, 7.4)                   | 73.1                |
| 3''                 | 3.28, t (8.3)                                |                     | 78.7                           | 3.28, t (8.6)                            | 78.7                           | 3.27, t (8.8)         | 3.32, t (8.8)                         | 76.5                |
| 4''                 | 3.22                                         |                     | 70.4                           | 3.23                                     | 70.5                           | 3.19, t (8.9)         | 3.19, t (8.6)                         | 69.6                |
| 5''                 | 3.24                                         |                     | 81.7                           | 3.22                                     | 81.8                           | 3.40                  | 3.46                                  | 77.2                |
| 6''                 | 3.71, dd (11.8, 1.7)<br>3.45, dd (12.0, 5.6) |                     | 61.4                           | 3.72, dd (11.8, 1.8)<br>3.45, brd (11.8) | 61.3                           | 3.92, d (9.2)<br>3.40 | 3.72, d (9.7)<br>3.48, dd (11.5, 5.5) | 60.6                |
|                     | 6''-Apif                                     |                     |                                |                                          |                                |                       |                                       |                     |
| 1'''                |                                              |                     |                                |                                          |                                | 4.78, d (3.1)         | 109.0                                 |                     |

---

|     |                 |   |      |
|-----|-----------------|---|------|
| 2'' | 3.73,<br>(3.1)  | d | 75.6 |
| 3'' |                 |   | 78.7 |
| 4'' | 3.84,<br>(9.4)  | d | 73.1 |
|     | 3.57,<br>(9.4)  | d |      |
| 5'' | 3.33,<br>(11.4) | d | 63.0 |
|     | 3.29,<br>(11.4) | d |      |

---

\* NMR spectra recorded at 30° C in DMSO-*d*<sub>6</sub> with 0.1% TFA, *J* in Hz; overlapping signals are reported without designated multiplicity
